# Supplementary material for: Myb-Binding Protein 1A (MYBBP1A) Is Essential for Early Embryonic Development, Controls Cell Cycle and Mitosis, and Acts as a Tumor Suppressor
Source: PubMed Central journal article supplement (PMC3466261; doi:10.1371/journal.pone.0039723), 2012-10-08

A

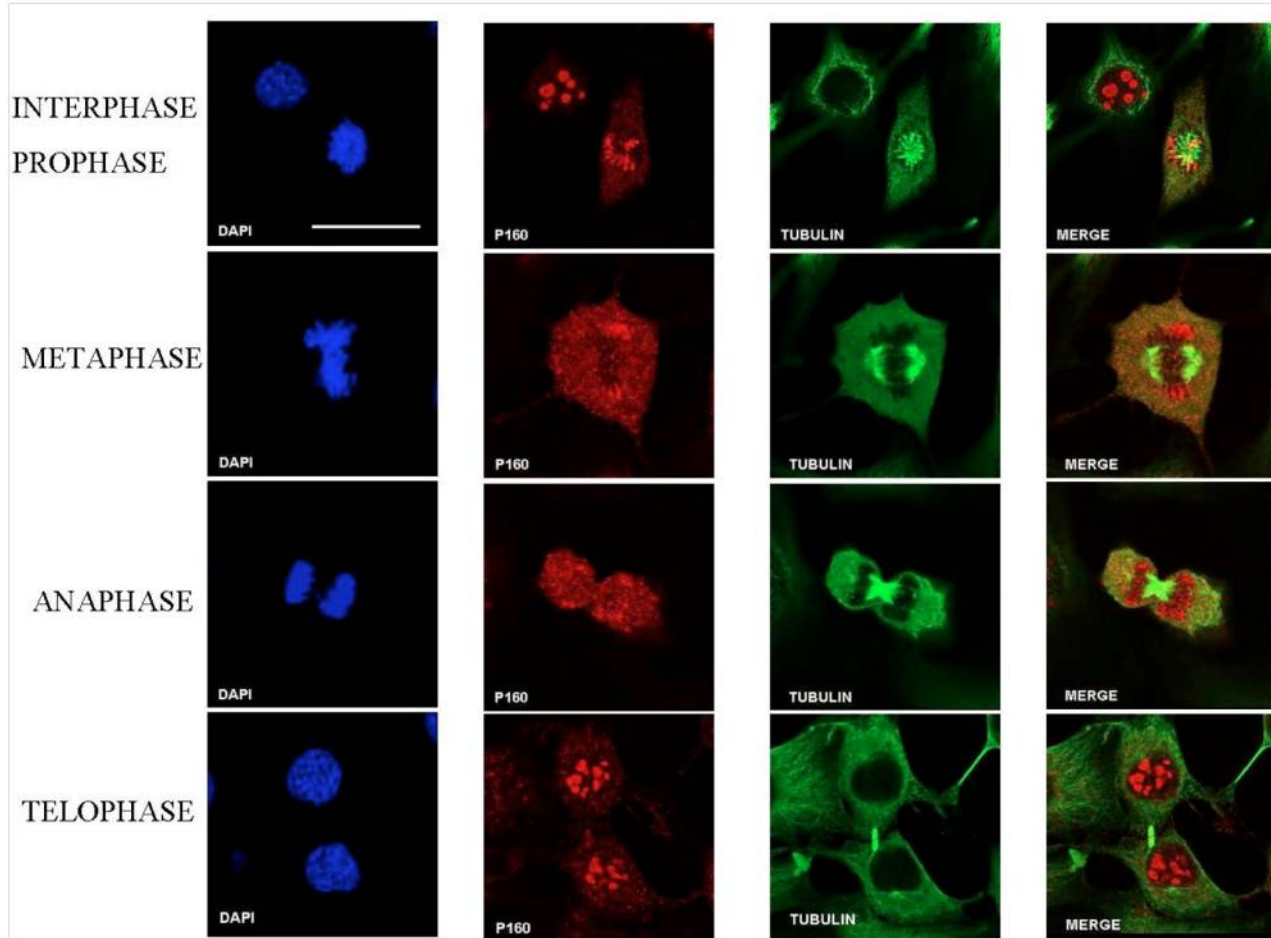

B

NIH 3T3 WT

NIH 3T3 p160Flag

Anti-p160

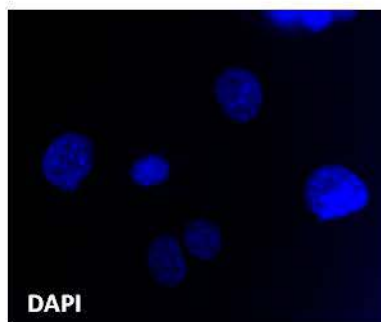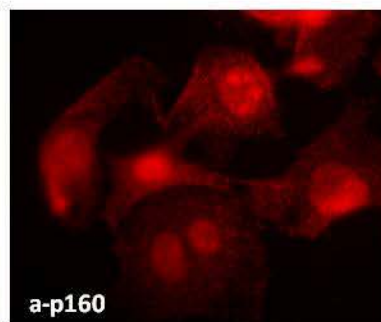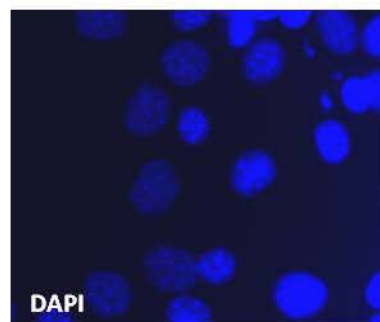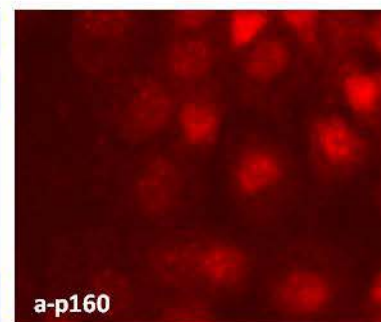

Anti-flag

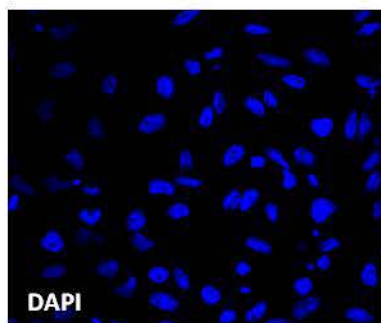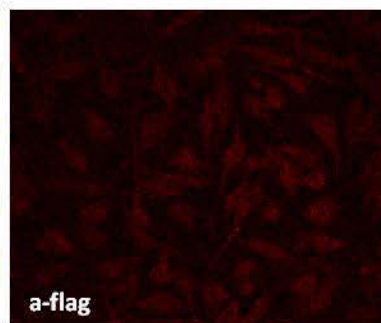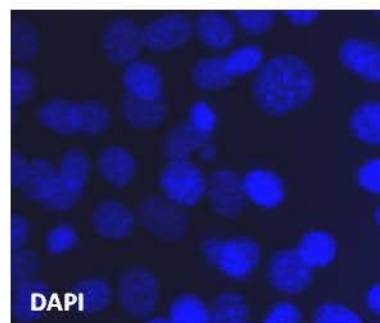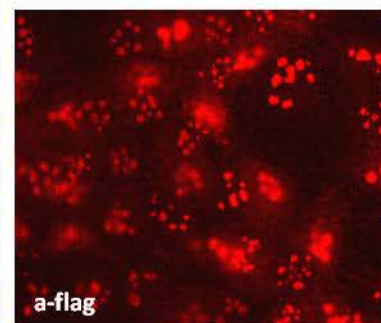

Supplement: pone.0039723.s002.pdf [file pone.0039723.s002.pdf]
